# Supplementary material for: Physical activity but not sedentary activity is reduced in primary Sjögren’s syndrome
Source: PubMed Central journal article supplement (PMC5357288; doi:10.1007/s00296-016-3637-6), 2016-12-24
Supplement: 296_2016_3637_MOESM2_ESM.pdf [file 296_2016_3637_MOESM2_ESM.pdf]

**PHYSICAL ACTIVITY BUT NOT SEDENTARY ACTIVITY IS REDUCED IN PRIMARY  
SJÖGREN'S SYNDROME**

**Rheumatology International**

Wan-Fai Ng<sup>1</sup>, Ariana Miller<sup>2</sup>, Simon J Bowman<sup>3</sup>, Elizabeth J Price<sup>4</sup>, George D Kitas<sup>5</sup>, Colin Pease<sup>6</sup>, Paul Emery<sup>6</sup>, Peter Lanyon<sup>7</sup>, John Hunter<sup>8</sup>, Monica Gupta<sup>8</sup>, Ian Giles<sup>9</sup>, David Isenberg<sup>9</sup>, John McLaren<sup>10</sup>, Marian Regan<sup>11</sup>, Annie Cooper<sup>12,13</sup>, Steven A Young-Min<sup>13</sup>, Neil McHugh<sup>14</sup>, Saravanan Vadivelu<sup>15</sup>, Robert J Moots<sup>16</sup>, David Coady<sup>17</sup>, Kirsten MacKay<sup>18</sup>, Bhaskar Dasgupta<sup>19</sup>, Nurhan Sutcliffe<sup>20</sup>, Michele Bombardieri<sup>20</sup>, Costantino Pitzalis<sup>20</sup>, Bridget Griffiths<sup>21</sup>, Sheryl Mitchell<sup>21</sup>, Samira Tatiyama Miyamoto<sup>22</sup>, Michael Trenell<sup>2</sup> on behalf of the UK primary Sjögren's syndrome registry<sup>23</sup>

<sup>1</sup>Musculoskeletal Research Group, <sup>2</sup>MoveLab, Physical Activity & Exercise Research, Institute of Cellular Medicine and NIHR Biomedical Research Centre for Ageing & Chronic Disease, Newcastle University, Newcastle upon Tyne, UK

<sup>3</sup>University Hospital Birmingham, Birmingham, UK

<sup>4</sup>Great Western Hospitals NHS Foundation Trust, Swindon, UK.

<sup>5</sup>Department of Rheumatology, Dudley Group of Hospitals NHS Trust, Dudley, UK.

<sup>6</sup>Institute of Rheumatic and Musculoskeletal Medicine, University of Leeds & NIHR Leeds Musculoskeletal Biomedical Research Unit, Leeds Teaching Hospitals Trust, Leeds, UK.

<sup>7</sup>Nottingham University Hospital, Nottingham, UK

<sup>8</sup>Gartnavel General Hospital, Glasgow, UK.

<sup>9</sup>University College London Hospitals NHS Foundation Trust, London, UK.

<sup>10</sup>NHS Fife, Whyteman's Brae Hospital, Kirkcaldy, UK

<sup>11</sup>Royal Derby Hospital, Derby, UK.

<sup>12</sup>Royal Hampshire County Hospital, Winchester, UK.

<sup>13</sup>Portsmouth Hospitals NHS Trust, Portsmouth, UK.

<sup>14</sup>Royal National Hospital for Rheumatic Diseases, Bath, UK

<sup>15</sup>Queen Elizabeth Hospital, Gateshead, UK.

<sup>16</sup>Aintree University Hospitals, Liverpool, UK

<sup>17</sup>Royal Sunderland Hospital, Sunderland, UK

<sup>18</sup>Torbay Hospital, Torquay, UK

<sup>19</sup>Southend University Hospital, Westcliff-on-Sea, UK.

<sup>20</sup>Barts and the London School of Medicine and Dentistry, UK

<sup>21</sup>Newcastle upon Tyne Hospitals NHS Foundation Trust, Newcastle upon Tyne, UK.

<sup>22</sup> Universidade Federal do Espirito Santo, Vitoria, Universidade Federal de São Paulo, São Paulo, BR.

CAPES Foundation scholar – Proc. n. BEX 8831/14-9

<sup>23</sup>Denotes corporate authorship. See appendix 1 for the full list of members.

Corresponding author: Wan-Fai Ng.

e-mail: [Wan-fai.Ng@ncl.ac.uk](mailto:Wan-fai.Ng@ncl.ac.uk)

**Supplementary table S2. Comparison of the primary Sjögren's syndrome cohort (matched IPAQ-SF) and unmatched IPAQ-SF cohort**

|                                      | <b>Matched IPAQ-SF<br/>group (PSS cohort)</b> | <b>Unmatched IPAQ-<br/>SF group</b> | <b>p</b> |
|--------------------------------------|-----------------------------------------------|-------------------------------------|----------|
| Sample size                          | 273                                           | 55                                  |          |
| Age (years)                          | 57 (47-65)                                    | 68 (60-73)                          | <0.001   |
| Gender (Number of females, (%))      | 254 (93%)                                     | 48 (87%)                            | 0.073*   |
| Body mass index (Kg/m <sup>2</sup> ) | 25 (23-28)                                    | 32 (24-37)                          | <0.001   |
| Disease duration (years)             | 5 (2-10)                                      | 4 (2-10)                            | 0.278    |
| CPS                                  | 7 (5-11)                                      | 9 (7-13)                            | 0.001    |
| Anti-Ro/La positive (number, (%))    | 242 (88.6%)                                   | 46 (84%)                            | 0.099    |
| ESSDAI (0-123)                       | 3 (1-7)                                       | 4 (1-7)                             | 0.300    |
| ESSPRI (0-10)                        | 5.3 (3.3-6.7)                                 | 5.3 (2.3-7.3)                       | 0.936    |
| EULAR-Sicca Score (0-10)             | 5.7 (3.7-7.7)                                 | 7 (3.3-8.7)                         | 0.533    |
| Overall fatigue (VAS, 0-100)         | 55 (29-72)                                    | 67 (22-76)                          | 0.487    |
| Physical fatigue (ProF, 0-7)         | 3.5 (2.3-4.8)                                 | 3.8 (1.9-5.3)                       | 0.843    |
| Mental fatigue (ProF, 0-7)           | 2.5 (1-4)                                     | 2.5 (1-4)                           | 0.508    |
| Pain (0-10)                          | 4 (1-6.8)                                     | 4 (2-7)                             | 0.669    |
| Anxiety (HADS, 0-21)                 | 7 (4-10)                                      | 6.5 (3-10)                          | 0.374    |
| Depression (HADS, 0-21)              | 4 (2-7)                                       | 6 (3-9)                             | 0.128    |
| Daytime sleepiness (ESS, 0-24)       | 7 (4-11)                                      | 8 (4-11)                            | 0.566    |
| Dysautonomia - COMPASS (0-170)       | 39 (27-50)                                    | 39 (23-54)                          | 0.639    |
| OGS (5-25)                           | 3 (0-5)                                       | 2 (0-3)                             | 0.031    |
| EQ-5D - TTO (-1 to 1)                | 0.73 (0.66-0.80)                              | 0.73 (0.62-0.80)                    | 0.258    |
| VAS (0 – 100)                        | 70 (50-80)                                    | 70 (40-80)                          | 0.617    |
| <b>Physical Activity Measures</b>    |                                               |                                     |          |
| Sitting time (min)                   | 300 (135-375)                                 | 270 (180-420)                       | 0.328    |
| Moderate PA (MET*min/week)           | 0 (0-480)                                     | 0 (0-400)                           | 0.265    |
| Vigorous PA (MET*min/week)           | 0 (0-480)                                     | 0 (0-0)                             | 0.465    |
| Walking (MET*min/week)               | 792 (396-2079)                                | 594 (248-2376)                      | 0.344    |
| Total PA score (MET*min/week)        | 1572 (594-3158)                               | 1386 (396-4692)                     | 0.556    |

All values are presented as medians (interquartile ranges) with the exception of sample size gender and anti-Ro/La positivity. \*Fisher exact test.

IPAQ-SF: International Physical Activity Questionnaire – short form; kg/m<sup>2</sup>: kilogram-meter squared; CPS: Comorbidity-Polypharmacy score; ESSDAI: EULAR Sjögren Syndrome Disease Activity Index; ESSPRI: EULAR Sjögren Syndrome Patient Reported Index; VAS: visual analogue scale; ProF: Profile of Fatigue ; HADS: Hospital Anxiety and Depression Scale; ESS: Epworth Sleepiness Scale; COMPASS: Composite Autonomic Symptom Scale; OGS: Orthostatic Grading Scale; EQ-5D: EuroQol 5-domain; TTO: time trade-off; PA: physical activity; min: minutes; MET: metabolic equivalent of task; min/wk: minutes per week
