# Supplementary material for: Physical activity but not sedentary activity is reduced in primary Sjögren’s syndrome
Source: PubMed Central journal article supplement (PMC5357288; doi:10.1007/s00296-016-3637-6), 2016-12-24
Supplement: 296_2016_3637_MOESM3_ESM.pdf [file 296_2016_3637_MOESM3_ESM.pdf]

**PHYSICAL ACTIVITY BUT NOT SEDENTARY ACTIVITY IS REDUCED IN PRIMARY  
SJÖGREN'S SYNDROME**

**Rheumatology International**

Wan-Fai Ng<sup>1</sup>, Ariana Miller<sup>2</sup>, Simon J Bowman<sup>3</sup>, Elizabeth J Price<sup>4</sup>, George D Kitas<sup>5</sup>, Colin Pease<sup>6</sup>, Paul Emery<sup>6</sup>, Peter Lanyon<sup>7</sup>, John Hunter<sup>8</sup>, Monica Gupta<sup>8</sup>, Ian Giles<sup>9</sup>, David Isenberg<sup>9</sup>, John McLaren<sup>10</sup>, Marian Regan<sup>11</sup>, Annie Cooper<sup>12,13</sup>, Steven A Young-Min<sup>13</sup>, Neil McHugh<sup>14</sup>, Saravanan Vadivelu<sup>15</sup>, Robert J Moots<sup>16</sup>, David Coady<sup>17</sup>, Kirsten MacKay<sup>18</sup>, Bhaskar Dasgupta<sup>19</sup>, Nurhan Sutcliffe<sup>20</sup>, Michele Bombardieri<sup>20</sup>, Costantino Pitzalis<sup>20</sup>, Bridget Griffiths<sup>21</sup>, Sheryl Mitchell<sup>21</sup>, Samira Tatiyama Miyamoto<sup>22</sup>, Michael Trenell<sup>2</sup> on behalf of the UK primary Sjögren's syndrome registry<sup>23</sup>

<sup>1</sup>Musculoskeletal Research Group, <sup>2</sup>MoveLab, Physical Activity & Exercise Research, Institute of Cellular Medicine and NIHR Biomedical Research Centre for Ageing & Chronic Disease, Newcastle University, Newcastle upon Tyne, UK

<sup>3</sup>University Hospital Birmingham, Birmingham, UK

<sup>4</sup>Great Western Hospitals NHS Foundation Trust, Swindon, UK.

<sup>5</sup>Department of Rheumatology, Dudley Group of Hospitals NHS Trust, Dudley, UK.

<sup>6</sup>Institute of Rheumatic and Musculoskeletal Medicine, University of Leeds & NIHR Leeds Musculoskeletal Biomedical Research Unit, Leeds Teaching Hospitals Trust, Leeds, UK.

<sup>7</sup>Nottingham University Hospital, Nottingham, UK

<sup>8</sup>Gartnavel General Hospital, Glasgow, UK.

<sup>9</sup>University College London Hospitals NHS Foundation Trust, London, UK.

<sup>10</sup>NHS Fife, Whyteman's Brae Hospital, Kirkcaldy, UK

<sup>11</sup>Royal Derby Hospital, Derby, UK.

<sup>12</sup>Royal Hampshire County Hospital, Winchester, UK.

<sup>13</sup>Portsmouth Hospitals NHS Trust, Portsmouth, UK.

<sup>14</sup>Royal National Hospital for Rheumatic Diseases, Bath, UK

<sup>15</sup>Queen Elizabeth Hospital, Gateshead, UK.

<sup>16</sup>Aintree University Hospitals, Liverpool, UK

<sup>17</sup>Royal Sunderland Hospital, Sunderland, UK

<sup>18</sup>Torbay Hospital, Torquay, UK

<sup>19</sup>Southend University Hospital, Westcliff-on-Sea, UK.

<sup>20</sup>Barts and the London School of Medicine and Dentistry, UK

<sup>21</sup>Newcastle upon Tyne Hospitals NHS Foundation Trust, Newcastle upon Tyne, UK.

<sup>22</sup> Universidade Federal do Espirito Santo, Vitoria, Universidade Federal de São Paulo, São Paulo, BR.

CAPES Foundation scholar – Proc. n. BEX 8831/14-9

<sup>23</sup>Denotes corporate authorship. See appendix 1 for the full list of members.

Corresponding author: Wan-Fai Ng.

e-mail: [Wan-fai.Ng@ncl.ac.uk](mailto:Wan-fai.Ng@ncl.ac.uk)

**Supplementary Table S3. Gender characteristics of the primary Sjögren's syndrome (PSS) cohort and matched healthy control**

|                                         | PSS cohort         |                     |       | Healthy control     |                     |       |
|-----------------------------------------|--------------------|---------------------|-------|---------------------|---------------------|-------|
|                                         | Female             | Male                | p     | Female              | Male                | p     |
| Sample size                             | 254                | 19                  |       | 254                 | 19                  |       |
| Age (years)                             | 58<br>(47-65)      | 53<br>(46-63)       | 0.372 | 58<br>(47-65)       | 54<br>(46-60)       | 0.404 |
| Body mass index<br>(kg/m <sup>2</sup> ) | 25<br>(23-28)      | 27<br>(24-29)       | 0.532 | 25<br>(23-27)       | 26<br>(23-28)       | 0.298 |
| Sitting time (min)                      | 240<br>(120-398)   | 300<br>(240-360)    | 0.798 | 343<br>(223-429)    | 394<br>(266-480)    | 0.976 |
| Vigorous PA<br>(MET*min/wk)             | 0<br>(0-480)       | 0<br>(0-1920)       | 0.022 | 480<br>(0-1920)     | 960<br>(0-2200)     | 0.380 |
| Moderate PA<br>(MET*min/wk)             | 0<br>(0-420)       | 160<br>(0-1200)     | 0.048 | 1560<br>(540-3900)  | 1740<br>(960-2880)  | 0.391 |
| Walking<br>(MET*min/wk)                 | 792<br>(396-2079)  | 990<br>(495-2376)   | 0.999 | 990<br>(462-3069)   | 792<br>(198-2079)   | 0.459 |
| Total PA score<br>(MET*min/wk)          | 1140<br>(590-3012) | 3150<br>(1224-6750) | 0.003 | 3690<br>(1732-9739) | 3990<br>(1700-6405) | 0.846 |

All values are presented as medians (interquartile ranges)

kg/m<sup>2</sup>: kilogram-meter squared; min: minutes; MET: metabolic equivalent of task; min/wk: minutes per week
