# Supplementary material for: Physical activity but not sedentary activity is reduced in primary Sjögren’s syndrome
Source: PubMed Central journal article supplement (PMC5357288; doi:10.1007/s00296-016-3637-6), 2016-12-24
Supplement: 296_2016_3637_MOESM4_ESM.pdf [file 296_2016_3637_MOESM4_ESM.pdf]

**PHYSICAL ACTIVITY BUT NOT SEDENTARY ACTIVITY IS REDUCED IN PRIMARY  
SJÖGREN'S SYNDROME**

**Rheumatology International**

Wan-Fai Ng<sup>1</sup>, Ariana Miller<sup>2</sup>, Simon J Bowman<sup>3</sup>, Elizabeth J Price<sup>4</sup>, George D Kitas<sup>5</sup>, Colin Pease<sup>6</sup>, Paul Emery<sup>6</sup>, Peter Lanyon<sup>7</sup>, John Hunter<sup>8</sup>, Monica Gupta<sup>8</sup>, Ian Giles<sup>9</sup>, David Isenberg<sup>9</sup>, John McLaren<sup>10</sup>, Marian Regan<sup>11</sup>, Annie Cooper<sup>12,13</sup>, Steven A Young-Min<sup>13</sup>, Neil McHugh<sup>14</sup>, Saravanan Vadivelu<sup>15</sup>, Robert J Moots<sup>16</sup>, David Coady<sup>17</sup>, Kirsten MacKay<sup>18</sup>, Bhaskar Dasgupta<sup>19</sup>, Nurhan Sutcliffe<sup>20</sup>, Michele Bombardieri<sup>20</sup>, Costantino Pitzalis<sup>20</sup>, Bridget Griffiths<sup>21</sup>, Sheryl Mitchell<sup>21</sup>, Samira Tatiyama Miyamoto<sup>22</sup>, Michael Trenell<sup>2</sup> on behalf of the UK primary Sjögren's syndrome registry<sup>23</sup>

<sup>1</sup>Musculoskeletal Research Group, <sup>2</sup>MoveLab, Physical Activity & Exercise Research, Institute of Cellular Medicine and NIHR Biomedical Research Centre for Ageing & Chronic Disease, Newcastle University, Newcastle upon Tyne, UK

<sup>3</sup>University Hospital Birmingham, Birmingham, UK

<sup>4</sup>Great Western Hospitals NHS Foundation Trust, Swindon, UK.

<sup>5</sup>Department of Rheumatology, Dudley Group of Hospitals NHS Trust, Dudley, UK.

<sup>6</sup>Institute of Rheumatic and Musculoskeletal Medicine, University of Leeds & NIHR Leeds Musculoskeletal Biomedical Research Unit, Leeds Teaching Hospitals Trust, Leeds, UK.

<sup>7</sup>Nottingham University Hospital, Nottingham, UK

<sup>8</sup>Gartnavel General Hospital, Glasgow, UK.

<sup>9</sup>University College London Hospitals NHS Foundation Trust, London, UK.

<sup>10</sup>NHS Fife, Whyteman's Brae Hospital, Kirkcaldy, UK

<sup>11</sup>Royal Derby Hospital, Derby, UK.

<sup>12</sup>Royal Hampshire County Hospital, Winchester, UK.

<sup>13</sup>Portsmouth Hospitals NHS Trust, Portsmouth, UK.

<sup>14</sup>Royal National Hospital for Rheumatic Diseases, Bath, UK

<sup>15</sup>Queen Elizabeth Hospital, Gateshead, UK.

<sup>16</sup>Aintree University Hospitals, Liverpool, UK

<sup>17</sup>Royal Sunderland Hospital, Sunderland, UK

<sup>18</sup>Torbay Hospital, Torquay, UK

<sup>19</sup>Southend University Hospital, Westcliff-on-Sea, UK.

<sup>20</sup>Barts and the London School of Medicine and Dentistry, UK

<sup>21</sup>Newcastle upon Tyne Hospitals NHS Foundation Trust, Newcastle upon Tyne, UK.

<sup>22</sup> Universidade Federal do Espírito Santo, Vitoria, Universidade Federal de São Paulo, São Paulo, BR.  
CAPES Foundation scholar – Proc. n. BEX 8831/14-9

<sup>23</sup>Denotes corporate authorship. See appendix 1 for the full list of members.

Corresponding author: Wan-Fai Ng.

e-mail: [Wan-fai.Ng@ncl.ac.uk](mailto:Wan-fai.Ng@ncl.ac.uk)

**Supplementary table S4. Bivariate correlation analysis between IPAQ-SF and clinical features of primary Sjögren's syndrome cohort**

|                          | <b>Total PA<br/>score</b> | <b>Sitting<br/>time</b> | <b>Moderate<br/>PA</b> | <b>Vigorous<br/>PA</b> | <b>Walking</b> |
|--------------------------|---------------------------|-------------------------|------------------------|------------------------|----------------|
| Age                      | -0.048                    | -0.078                  | -0.113                 | -0.196**               | 0.065          |
| Body mass index          | -0.008                    | 0.066                   | -0.004                 | 0.030                  | -0.037*        |
| Disease duration         | -0.079                    | 0.069                   | -0.030                 | -0.129*                | -0.012         |
| CPS                      | -0.101                    | 0.102                   | -0.141*                | -0.138*                | -0.025         |
| Anti-Ro/La status        | -0.008                    | -0.046                  | -0.066                 | -0.014                 | -0.090         |
| ESSDAI                   | -0.011                    | 0.015                   | -0.091                 | 0.049                  | -0.026         |
| ESSPRI                   | -0.049                    | -0.001                  | -0.114                 | -0.190**               | 0.088          |
| EULAR-Sicca Score        | 0.073                     | 0.014                   | -0.065                 | -0.130*                | 0.201**        |
| Overall fatigue (VAS)    | -0.137*                   | 0.025                   | -0.128*                | -0.200**               | -0.004         |
| Physical fatigue (ProF)  | -0.159**                  | 0.048                   | -0.113                 | -0.249**               | -0.033         |
| Mental fatigue (ProF)    | -0.135*                   | -0.029                  | -0.068                 | -0.144*                | -0.063         |
| Pain                     | -0.049                    | -0.69                   | -0.082                 | -0.168**               | 0.028          |
| Anxiety (HADS)           | -0.05                     | -0.053                  | 0.081                  | -0.041                 | -0.051         |
| Depression (HADS)        | -0.146*                   | -0.007                  | -0.103                 | -0.084                 | -0.087         |
| Daytime sleepiness (ESS) | 0.018                     | 0.009                   | -0.099                 | -0.017                 | 0.012          |
| Dysautonomia - COMPASS   | -0.056                    | -0.113                  | -0.071                 | -0.098                 | 0.024          |
| OGS                      | -0.124*                   | 0.085                   | -0.081                 | -0.107                 | -0.052         |
| EQ-5D - TTO              | 0.200**                   | 0.047                   | 0.122*                 | 0.175**                | 0.080          |
| VAS                      | 0.163**                   | -0.058                  | 0.085                  | 0.129*                 | 0.100          |

\*p<0.05, \*\*p<0.01

IPAQ-SF: International Physical Activity Questionnaire – short form; PA: physical activity; CPS: Comorbidity-Polypharmacy score; ESSDAI: EULAR Sjögren Syndrome Disease Activity Index; ESSPRI: EULAR Sjögren Syndrome Patient Reported Index; VAS: visual analogue scale; ProF: Profile of Fatigue ; HADS: Hospital Anxiety and Depression Scale; ESS: Epworth Sleepiness Scale; COMPASS: Composite Autonomic Symptom Scale; OGS: Orthostatic Grading Scale; EQ-5D: EuroQol 5-domain; TTO: time trade-off
